# Supplementary material
Source: Springer Nature journal article supplement (https://www.springerprofessional.de/resource/supplementary/40192_2013_10_MOESM3_ESM.pdf/11899508)

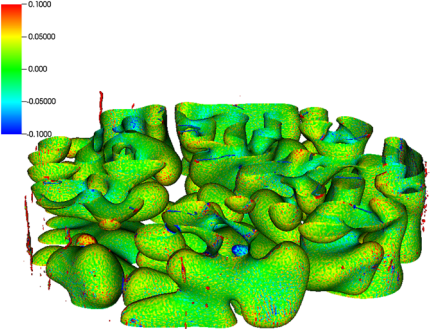**A**250  $\mu\text{m}$ 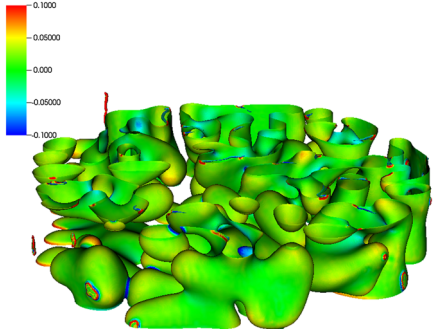**B**250  $\mu\text{m}$

Supplement: MOESM3 [file 11899508]
